# Supplementary material for: Magnetic assembly-mediated enhancement of differentiation of mouse bone marrow cells cultured on magnetic colloidal assemblies
Source: PubMed Central journal article supplement — Sci Rep. 2014 May 30;4:5125. doi: 10.1038/srep05125 (PMC4038806; doi:10.1038/srep05125), 2014-05-30
Supplement: srep05125-s1.pdf [file srep05125-s1.pdf]

# Magnetic assembly-mediated enhancement of differentiation of mouse marrow cells cultured on magnetic colloidal assemblies

Jianfei Sun<sup>§</sup>, Xuan Liu<sup>§</sup>, Jiqing Huang, Lina Song, Zihao Chen, Haoyu Liu, Yan Li,  
Yu Zhang, Ning Gu<sup>\*</sup>

Supporting Information

## Supporting Information

Figure S1

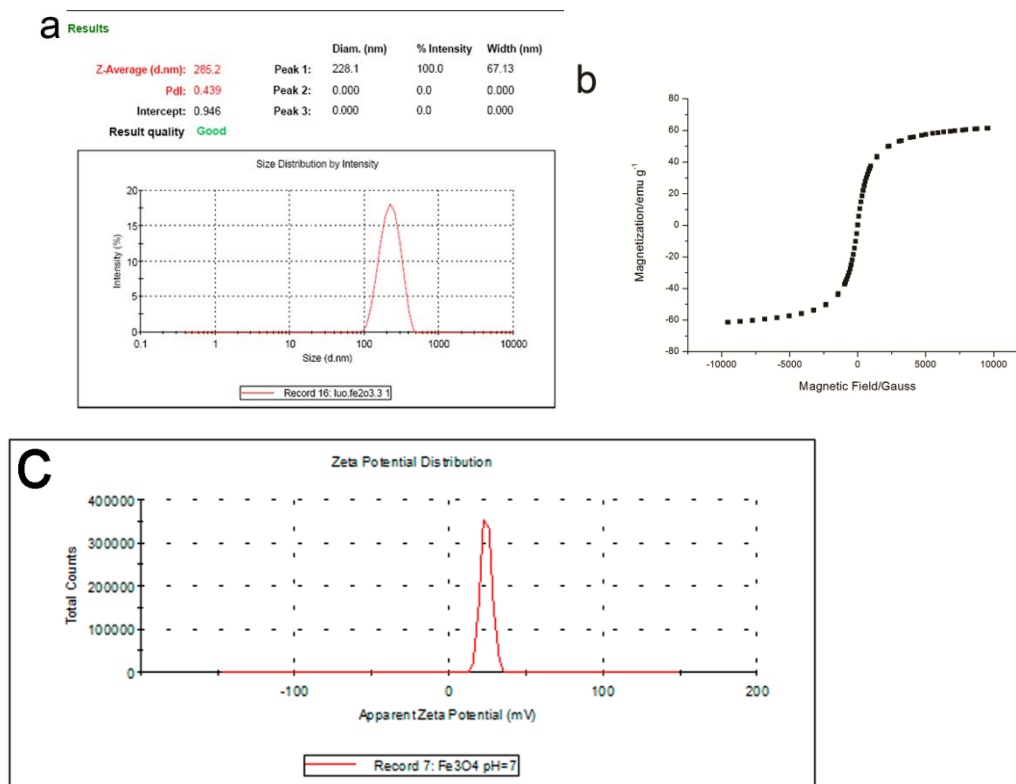

Figure S1 characterization of magnetic nanoparticles. **a**, DLS (Dynamic Light Scattering). **b**, VSM (Vibrating Sample Magnetometer). **c**,  $\zeta$  potential (pH=7).

Figure S2

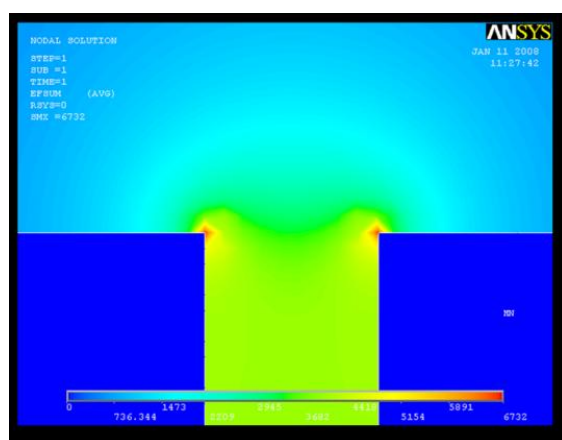

Figure S2 Simulation of field distribution between two magnetic poles. Red color denotes high field strength. Same color means uniform field.

Figure S3

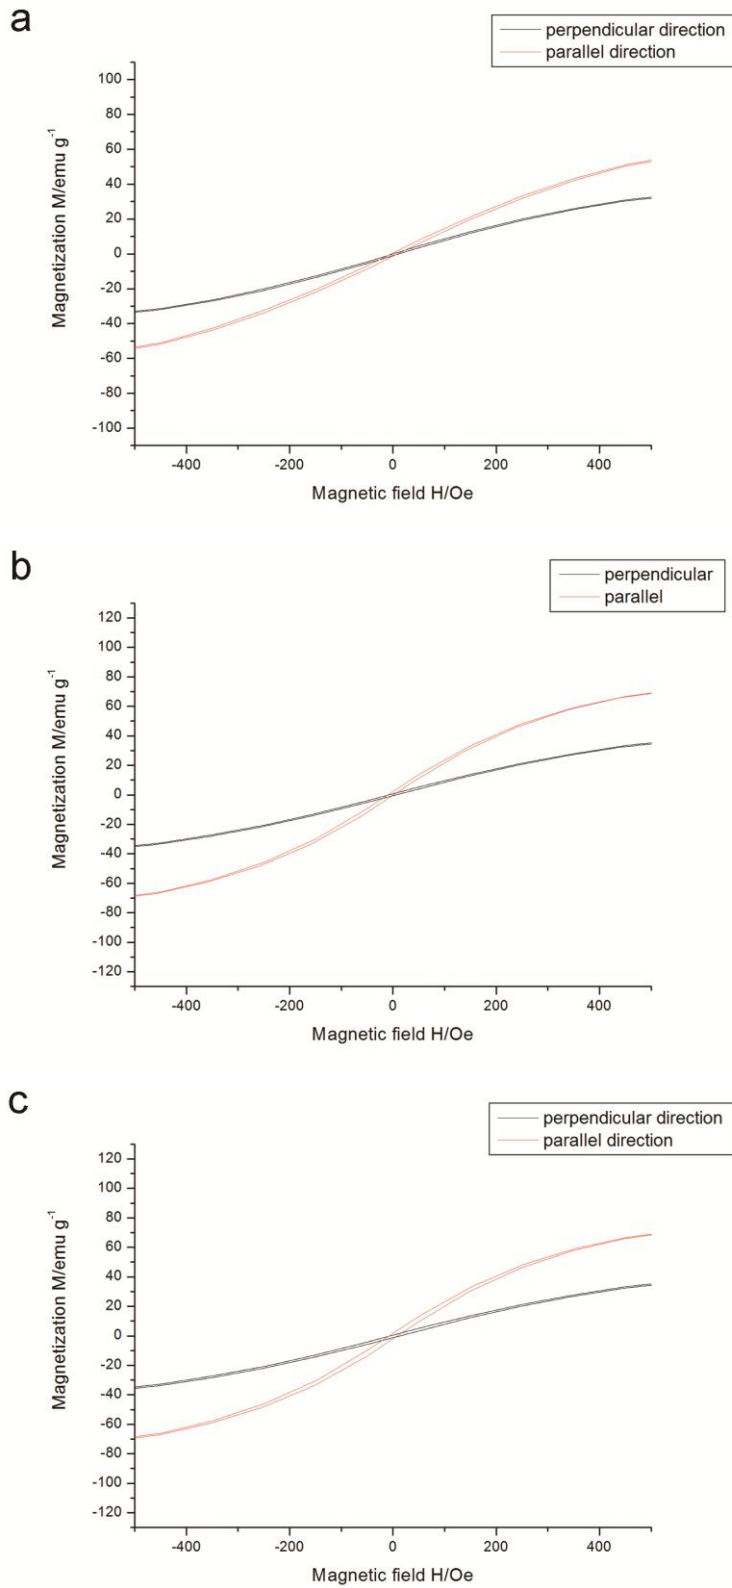

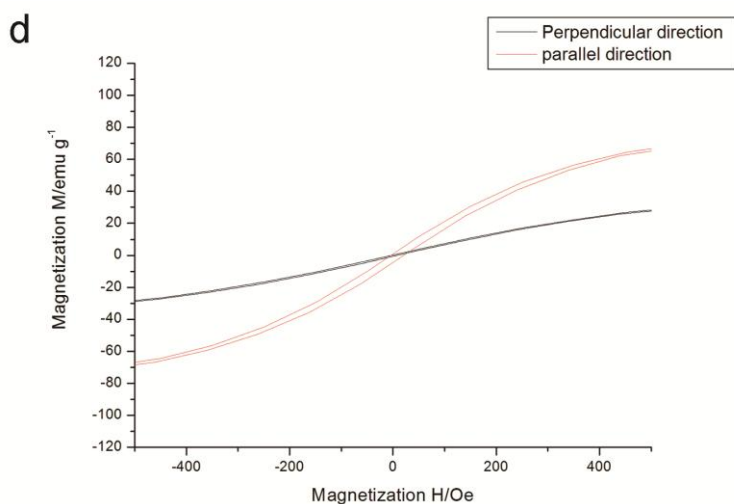

*Figure S3* Magnetization curves of different samples of magnetic nanoparticles. **a**, natural aggregates in the absence of magnetic field. **b**, assemblies fabricated under 20mT. **c**, assemblies fabricated under 40mT. **d**, assemblies fabricated under 80mT.

**Figure S4**

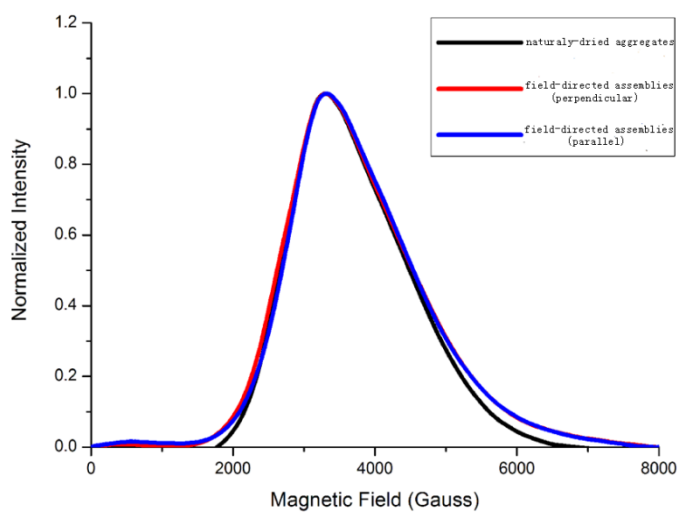

*Figure S4* FMR spectra of naturally-dried aggregates, perpendicular field-directed and parallel field-directed assemblies of DMSA-capped  $\gamma$ -Fe<sub>2</sub>O<sub>3</sub> nanoparticles. The curves showed little difference.

Figure S5

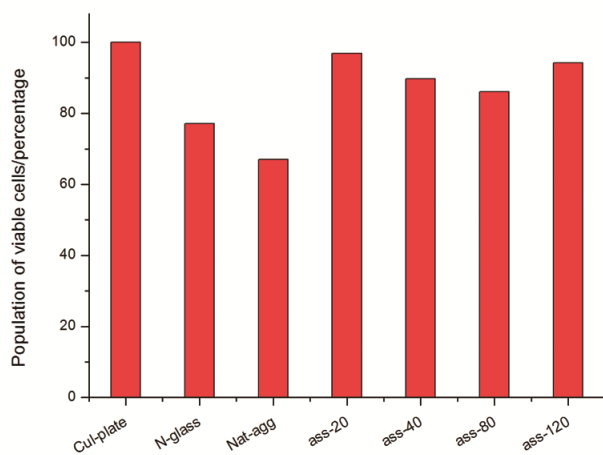

Figure S5 Measurement of cellular viability with flow cytometry.

Figure S6

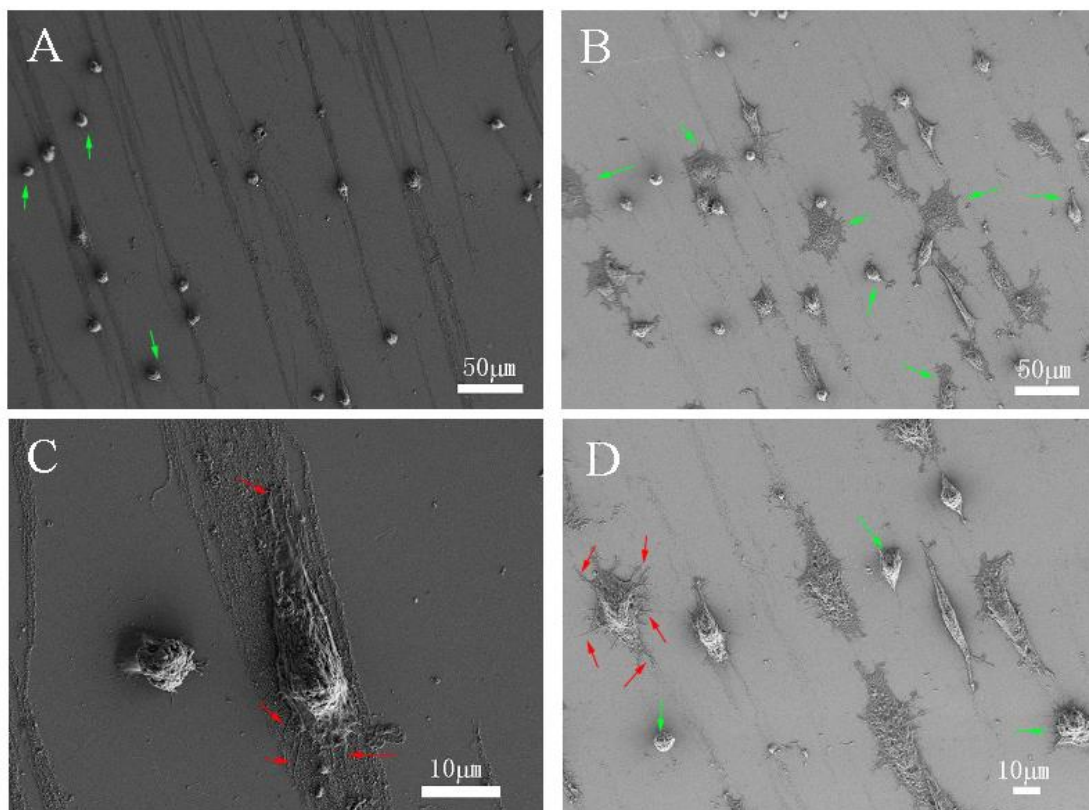

Figure S6 Characterization of the cellular adhesion on the assemblies of  $\gamma\text{-Fe}_2\text{O}_3$  nanoparticles on four different positions.

Figure S7

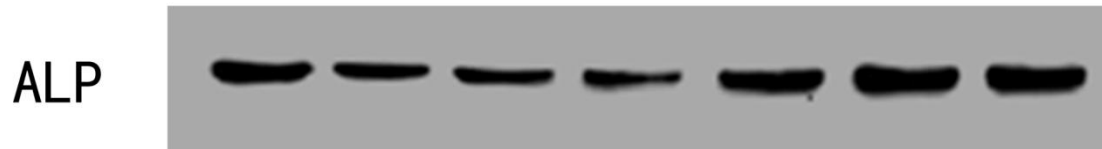

*Figure S7* Western Blotting measurement of ALP expression. From the left to the right: commercial culturing plate, bare glass plate, the naturally-dried aggregates, the stripe-like assemblies fabricated by 20mT field, the stripe-like assemblies fabricated by 40mT field, the stripe-like assemblies fabricated by 80mT field, the stripe-like assemblies fabricated by 120mT field.

Figure S8

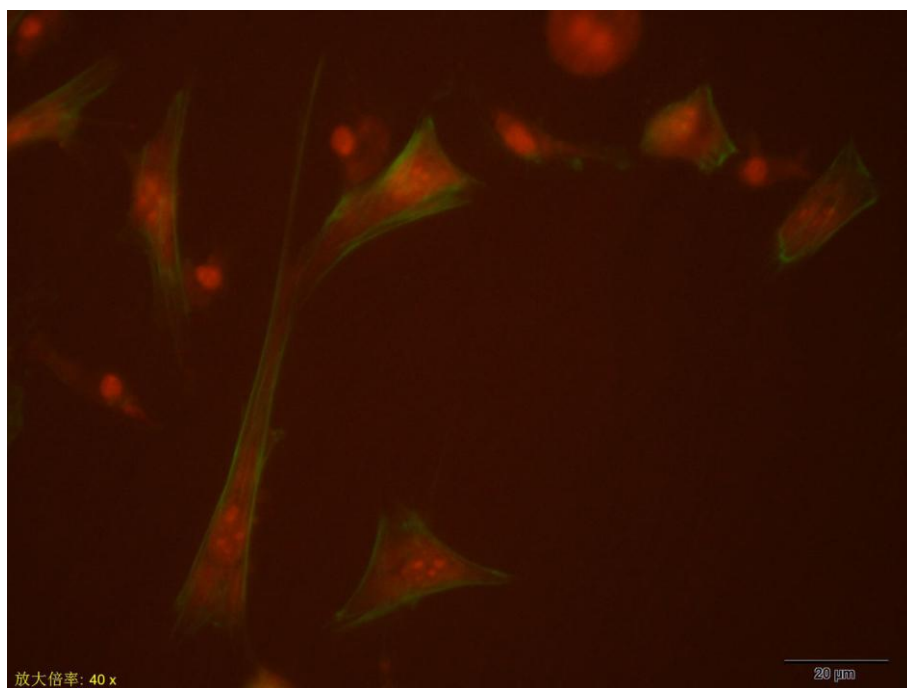

*Figure S8* Fluorescent staining of cytoskeleton, which were elongated by the assemblies on the culturing substrate. Green color: cytoskeleton. Red color: nucleolus.

Figure S9

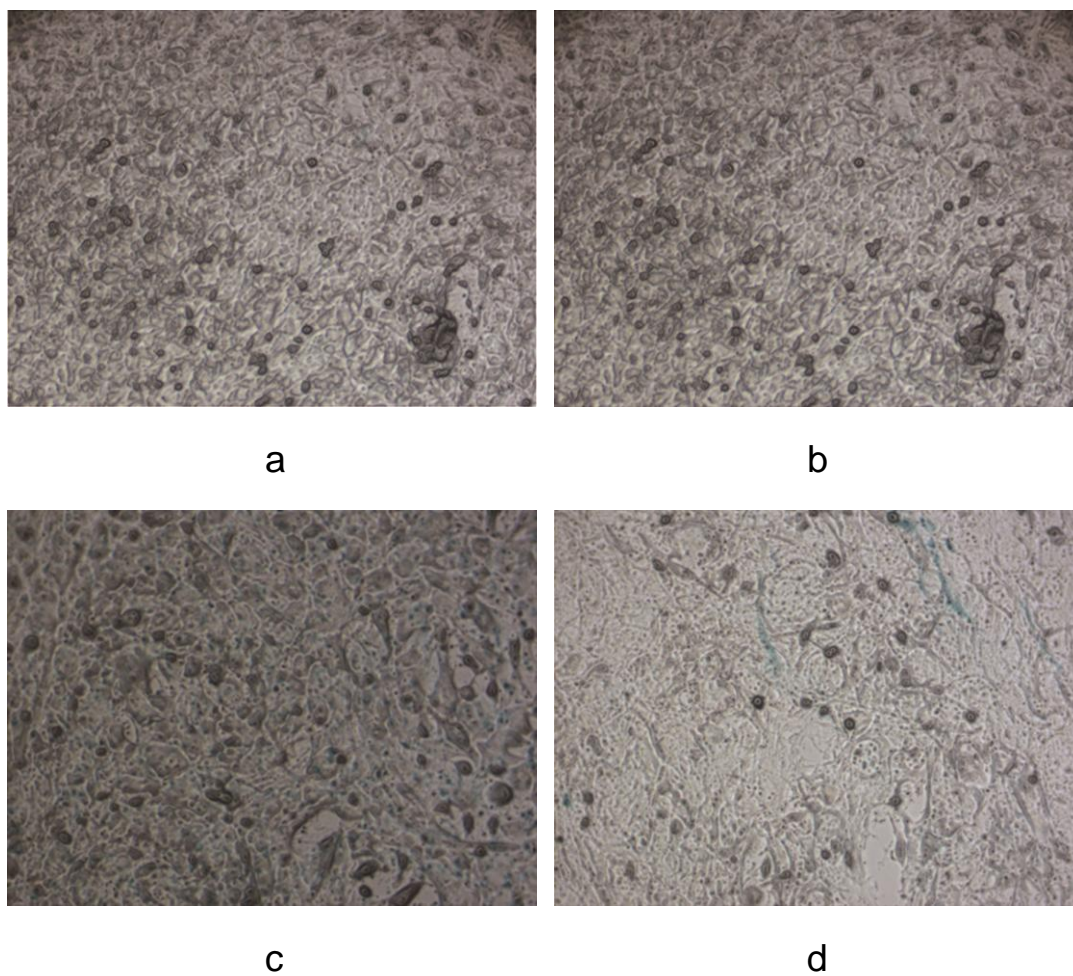

*Figure S9* Prussian blue staining of cells cultured on the commercial culturing plate (a), the bare glass plate (b), the naturally-dried aggregates of nanoparticles (c) and the stripe-like assemblies of nanoparticles (d).

Figure S10

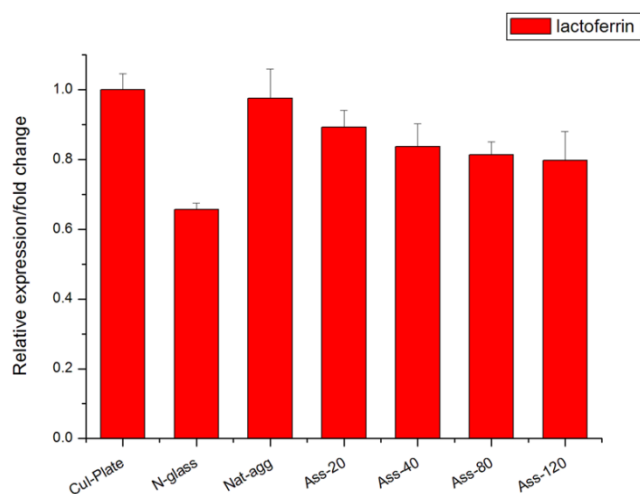

*Figure S10* RNA lactoferrin transcription of cells cultured on different surfaces with q-PCR. Here Cur-plate means the commercial culturing plate for cells. N-glass means the bare glass plate. Nat-agg means the naturally-dried aggregates of nanoparticles. Ass-20, Ass-40, Ass-80 and Ass-120 mean the stripe-like assemblies fabricated under the 20mT, 40mT, 80mT and 120mT field strength, respectively.
